# Supplementary material
Source: PubMed Central journal article supplement (PMC6885744)
Supplement: EMBJ-38-e101230-s001.pdf [file EMBJ-38-e101230-s001.pdf]

## Expanded View Figures

### Figure EV1. CAD cells are responsive to Wnt signals.

- A mRNA expression levels of 10 Fzd receptors in CAD cells were determined by qPCR analysis. *RPLPO* mRNA expression was used for normalization. Efficiency (eff) was calculated for each set of primers and used for the calculation of the expression by  $-\Delta\Delta C_T$  method.
- B Representing confocal images of CAD cells treated for 4 h with 200  $\mu$ M H<sub>2</sub>O<sub>2</sub>, 200 ng/ml Wnt7a, or 200 ng/ml Wnt5a. Cells were fixed and then stained with WGA (green) and DAPI (blue).
- C Percentage of TNT-connected CAD cells with each of the indicated treatments.
- D Average transferred vesicle per acceptor cell with indicated treatments.
- E Immunoblot of activated  $\beta$ -catenin in CAD cells cultured in control conditions or treated for 4 h with 200  $\mu$ M H<sub>2</sub>O<sub>2</sub>; 10 mM LiCl; or 50, 100, and 200 ng/ml Wnt7a. GAPDH was used as loading control.
- F Immunoblot of activated  $\beta$ -catenin and phosphorylated GSK3 $\beta$  (S9) in CAD cells treated in the presence or absence of Wnt7a for the indicated time points. Immunoblots show that 200 ng/ml Wnt7a could not activate  $\beta$ -catenin, while 10 mM LiCl effectively activated  $\beta$ -catenin after 60 min of incubation. GAPDH was used as loading control.
- G Representative confocal images of control CAD cells and cells treated with 200  $\mu$ M H<sub>2</sub>O<sub>2</sub>, LiCl, or NaCl for 4 h. Cells were stained with WGA (green) and Hoechst (blue).
- H Percentage of TNT-connected CAD cells with each of the indicated treatments.

Data information: In (B, G), scale bars represent 10  $\mu$ m. In (A, C, D, H), graph represents the average of three independent experiments  $\pm$  SEM. Statistical significance was calculated with respect to control (Ctrl); \* $P \leq 0.05$ , NS = not significant (one-way ANOVA).

Source data are available online for this figure.

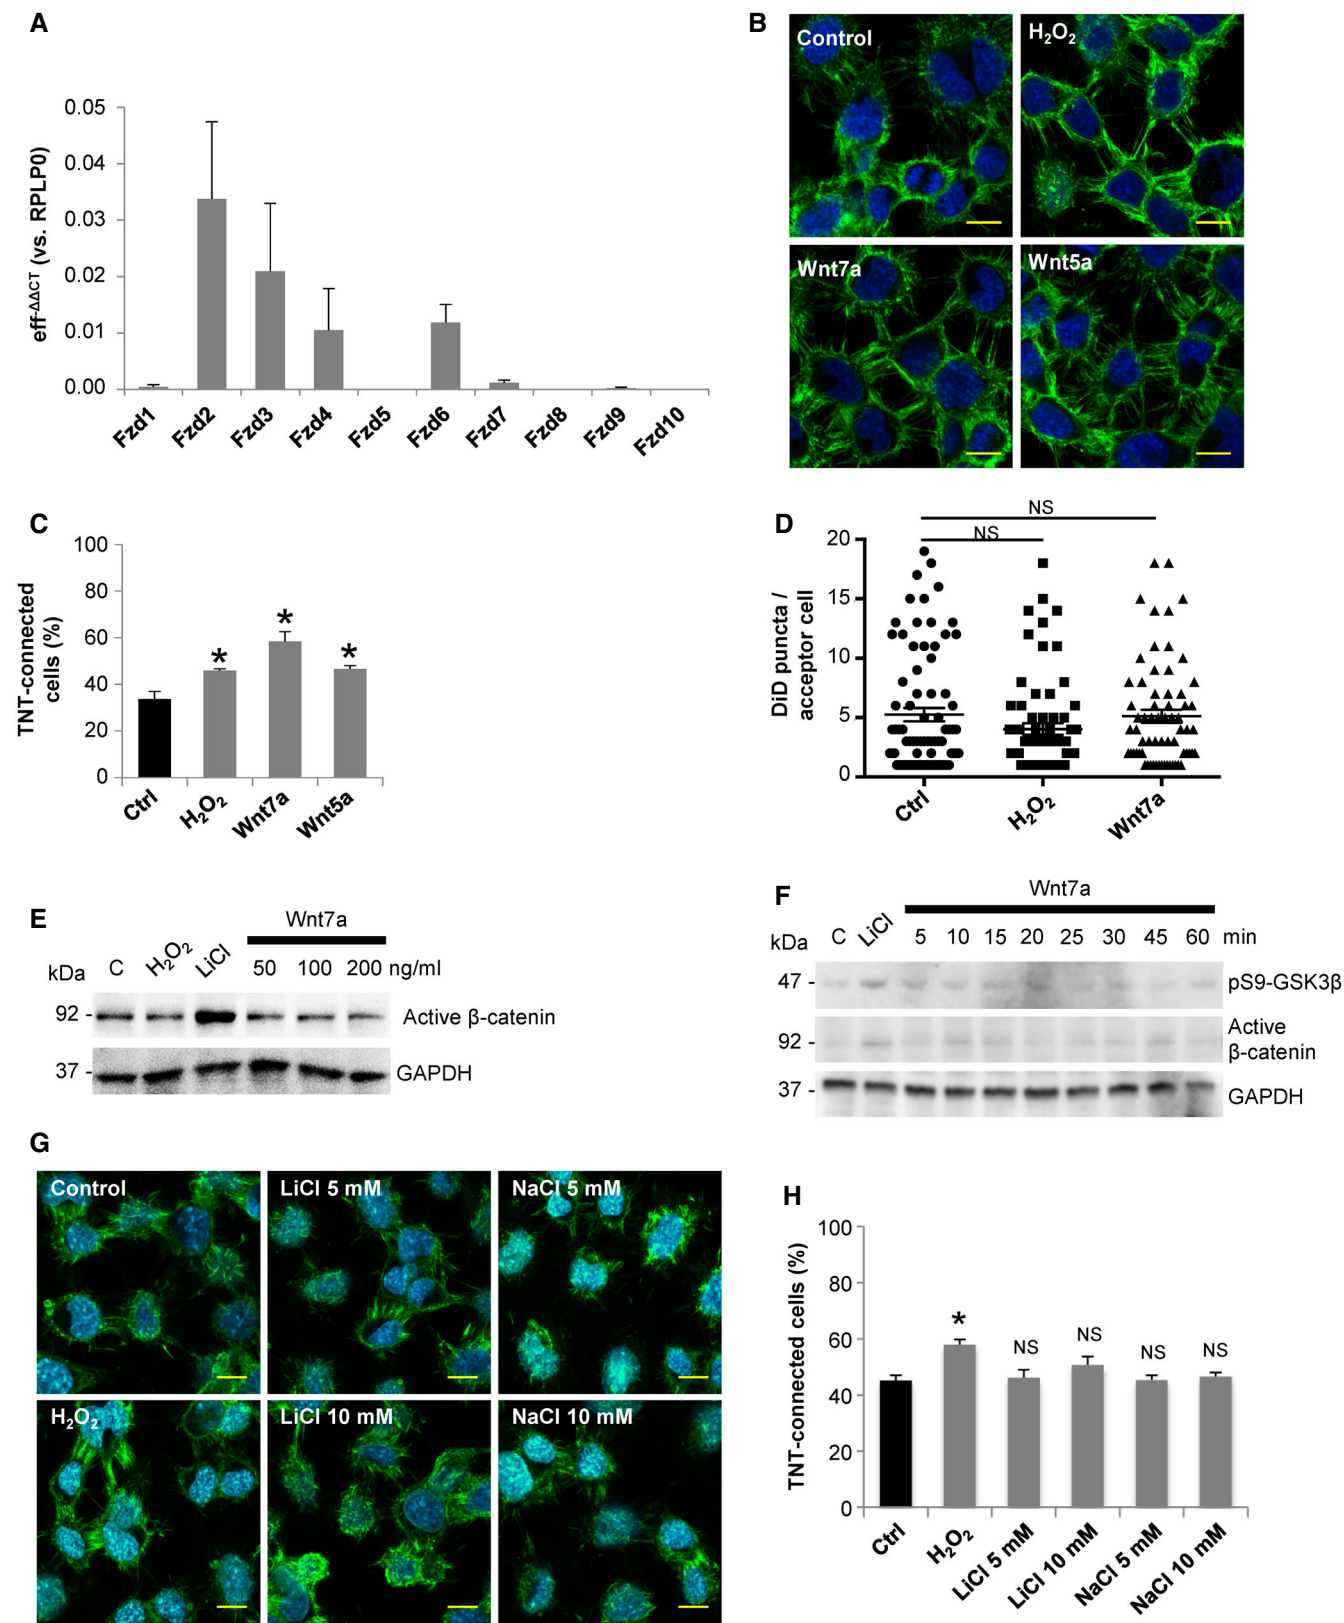

Figure EV1.

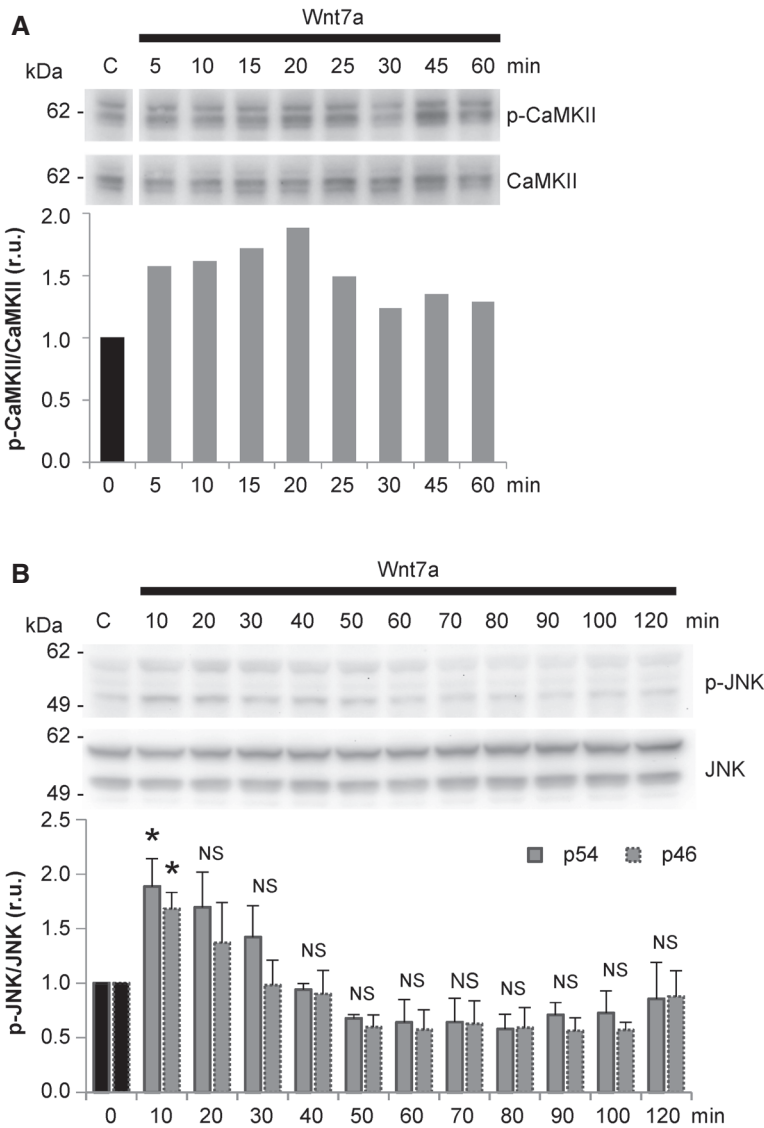

**Figure EV2. Wnt7a induces the activation of Wnt/ $\beta$ -catenin-independent pathways in CAD cells.**

A Western blot analysis of CaMKII and p-CaMKII in CAD cells treated in the presence or absence of Wnt7a for the indicated time points. Immunoblot and bar graph show that 200 ng/ml Wnt7a activated CaMKII in CAD cells. The graph shows p-CaMKII/CaMKII values (r.u., relative units) for each time point normalized to time 0.

B Western blot analysis of JNK and p-JNK in CAD cells treated in the presence or absence of Wnt7a for the indicated time points. Immunoblot and bar graph show that 200 ng/ml Wnt7a activated JNK in CAD cells. The graph shows p-JNK/JNK values (r.u., relative units) for each time point normalized to time 0. The data are presented as the average of three independent experiments  $\pm$  SEM. Statistical significance was calculated with respect to control (Ctrl); \* $P \leq 0.05$ , NS = not significant (one-way ANOVA).

Source data are available online for this figure.

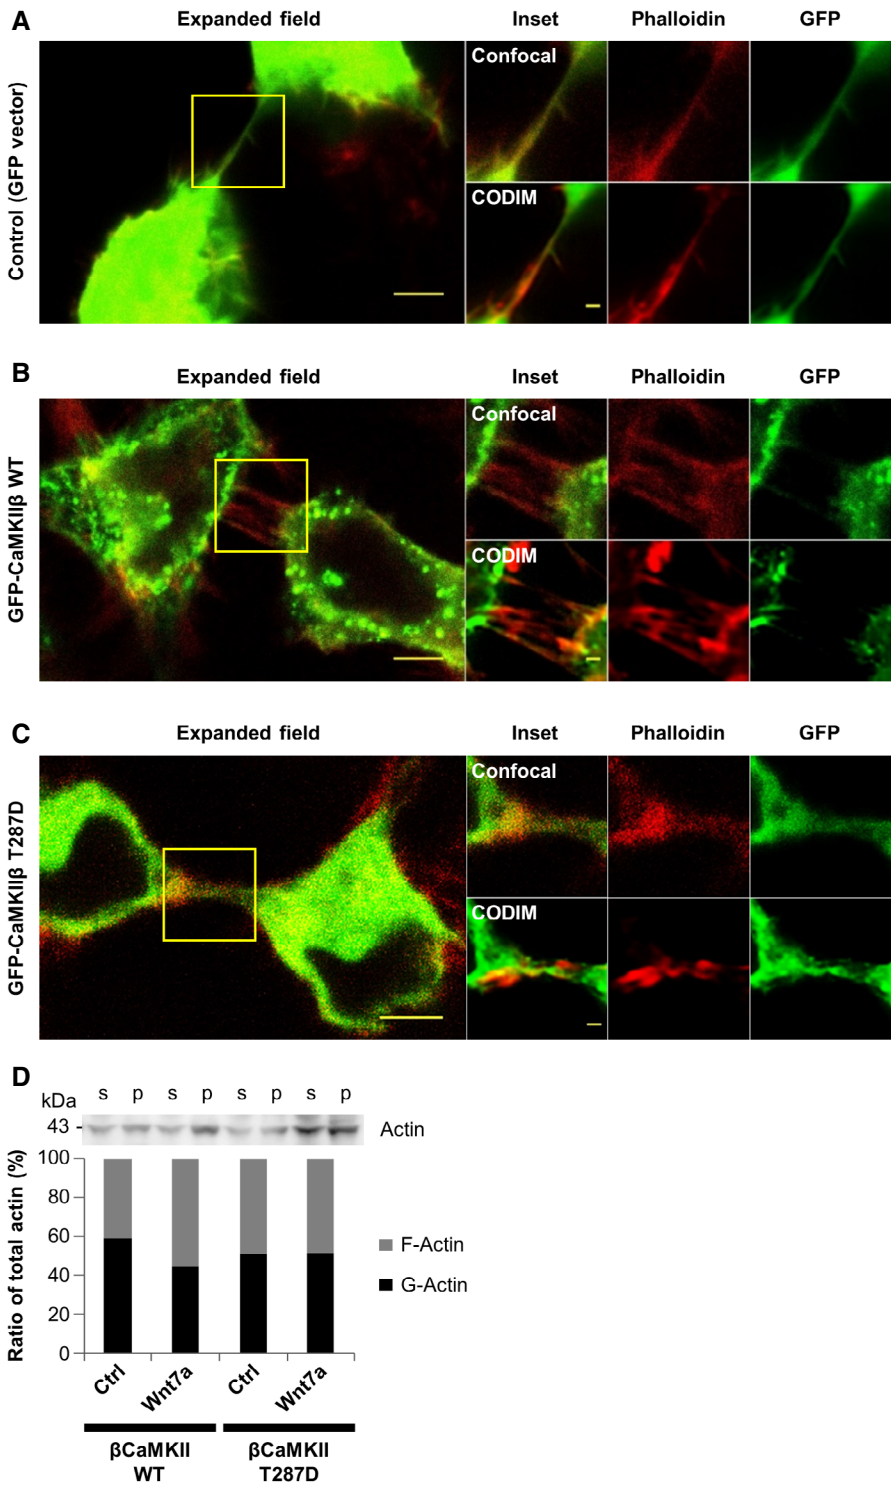

**Figure EV3. Actin-binding activity of  $\beta$ CaMKII modulates actin dynamics.**

A–C Image resolution comparison between images obtained with CODIM super-resolution and confocal microscopy techniques. Confocal (3 upper panels at the right) and CODIM super-resolution images (3 bottom panels at the right) of the area depicted in the confocal expanded field images (left panels) of transfected cells (green) showing expression of GFP-vector (A), GFP- $\beta$ CaMKII WT (B), or GFP- $\beta$ CaMKII T287D (C). Cells were stained for F-actin with phalloidin (red). Note: CODIM images presented here are the same as those in Fig 4C. Scale bars in the expanded field represent 5  $\mu$ m and 1  $\mu$ m in the inset.

D Anti-actin immunoblot and bar graph showing changes in the ratio between G-actin (in supernatant fraction, s) and F-actin (in the pellet fraction, p) of CAD cells transfected with either GFP- $\beta$ CaMKII WT or GFP- $\beta$ CaMKII T287D plasmids and treated or not with 200 ng/ml Wnt7a.

Source data are available online for this figure.

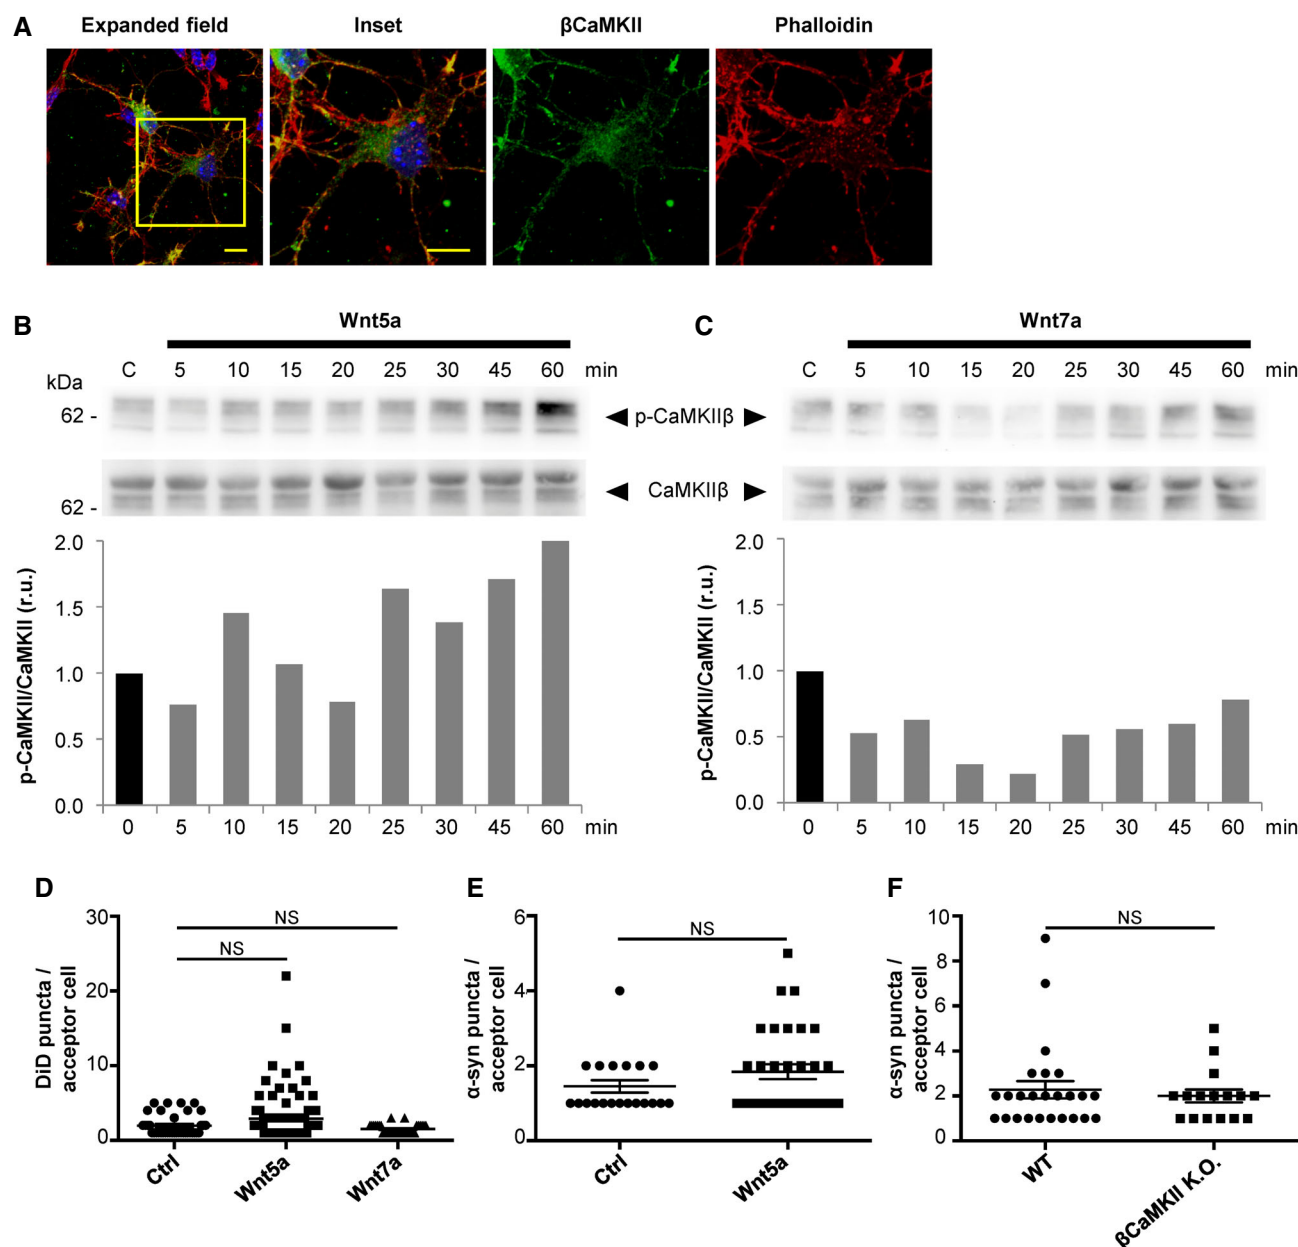

**Figure EV4. Wnt5a, but not Wnt7a, activates CaMKII in cortical neurons.**

**A** Confocal images representing the intracellular localization of endogenous  $\beta$ CaMKII in primary mouse cortical neurons of 1 DIV. Cells were also stained with DAPI (blue) and phalloidin (red). Scale bars represent 10  $\mu$ m.

**B, C** Western blot analysis of CaMKII and p-CaMKII in CAD cells treated with Wnt5a (**B**) or Wnt7a (**C**) for the indicated time points. The graphs show p-CaMKII/CaMKII values (r.u., relative units) for each time point normalized to time 0.

**D–F** Average number of transferred vesicles or  $\alpha$ -syn puncta per acceptor neurons for the indicated treatment or genotypes. Graphs represent the average of three independent experiments  $\pm$  SEM. Statistical significance was calculated with respect to control (Ctrl); NS = not significant (one-way ANOVA for **D** and Student's *t*-test for **E, F**).

Source data are available online for this figure.
