# Supplementary material
Source: PubMed Central journal article supplement (PMC6885744)

Figure 5B  
Source Data

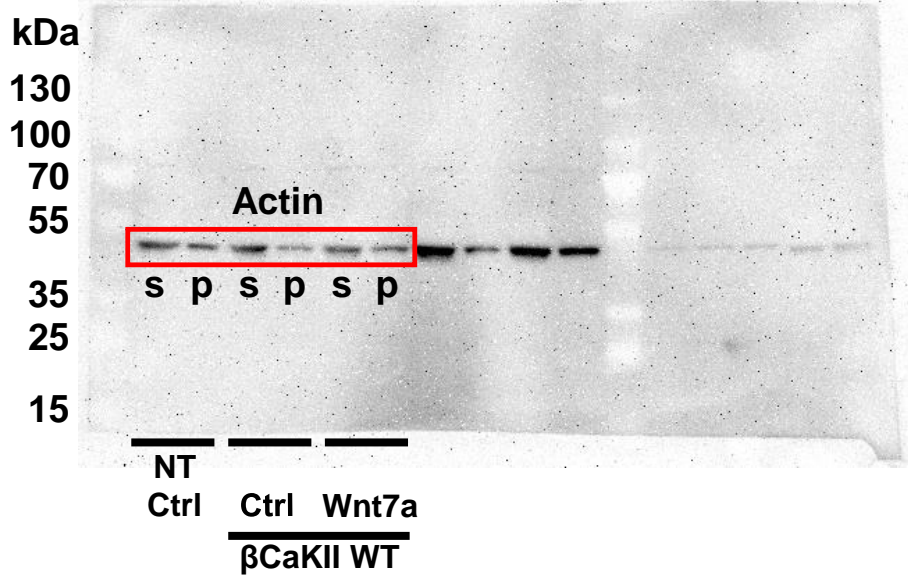

Supplement: EMBJ-38-e101230-s006.pdf [file EMBJ-38-e101230-s006.pdf]
